# Supplementary material
Source: publisher figshare collection journal article supplement (https://tandf.figshare.com/articles/dataset/_/16843699)
Supplement: Supplementary file 1 [file 1]

**Fig. A.6 City-center flat *(Source: AURAN)***
